# Supplementary material for: Temperature tuned syntheses of two new d10-based Cd(ii) cluster metal–organic frameworks: luminescence sensing and photocatalytic properties
Source: Royal Society of Chemistry journal article supplement (doi:10.1039/c9ra05167h), 2019-01-01
Supplement: c9ra05167h1.pdf [file c9ra05167h1.pdf]

## Supporting Information

### **Temperature tuned syntheses of two new d<sup>10</sup>-based Cd(II) cluster metal organic frameworks: Luminescent sensing and photocatalytic properties**

Caiping Li,<sup>a</sup> Lu Lu,<sup>a\*</sup> Jun Wang,<sup>a</sup> Qianqian Yang<sup>b\*</sup>, Deyun Ma,<sup>c</sup> Abhinav Kumar,<sup>d\*</sup> Mohd. Muddassir,<sup>\*e</sup> Ahmad Alowais,<sup>e</sup> and Naaser A. Y. Abduh<sup>e</sup>

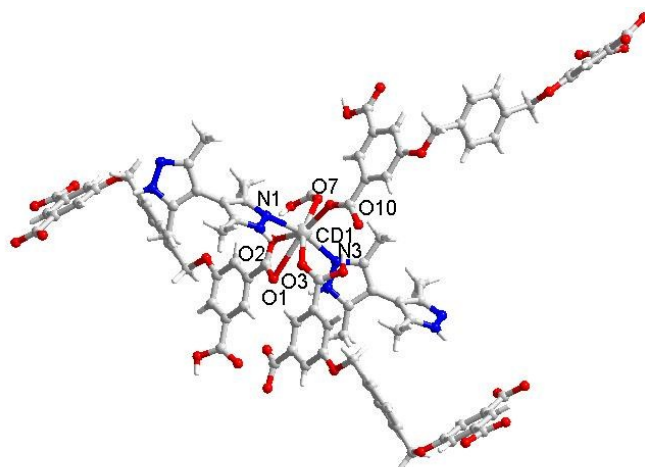

Fig. S1 view of the coordination environment of Cd(II) in **1**.

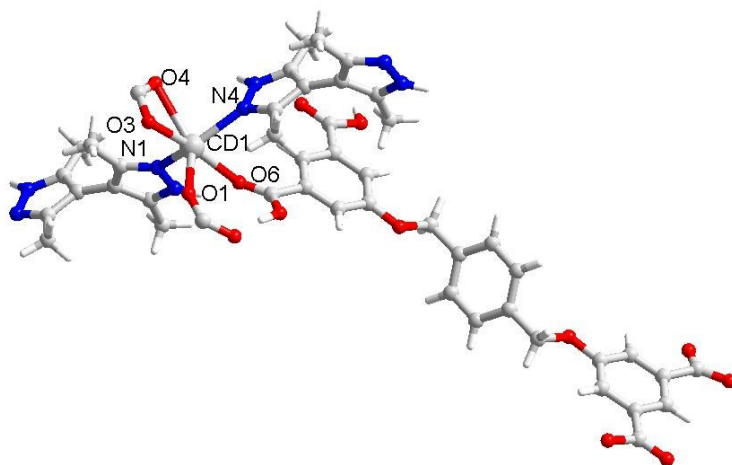

Fig. S2 view of the coordination environment of Cd(II) in **2**.

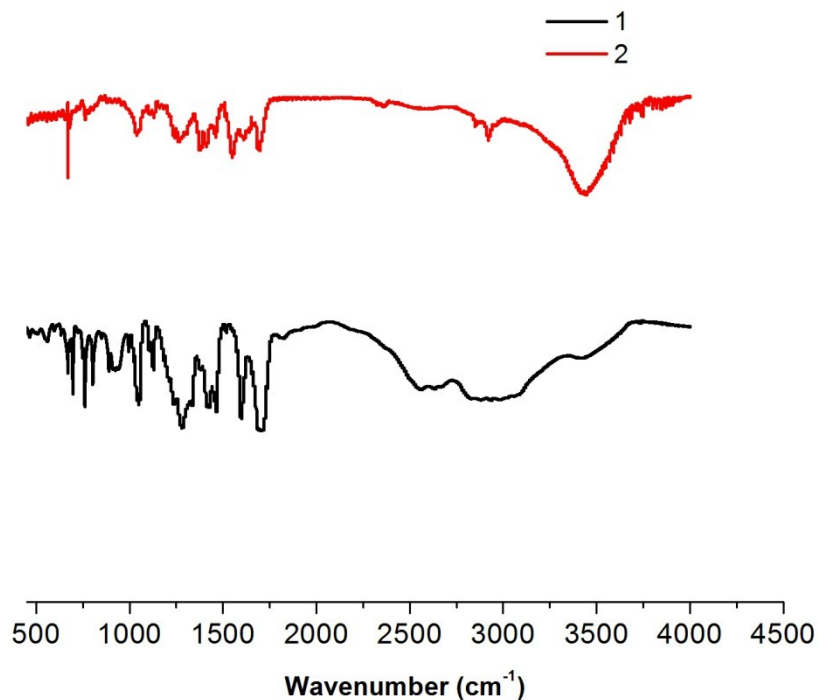

Fig. S3 FTIR spectra for MOFs **1** and **2**.

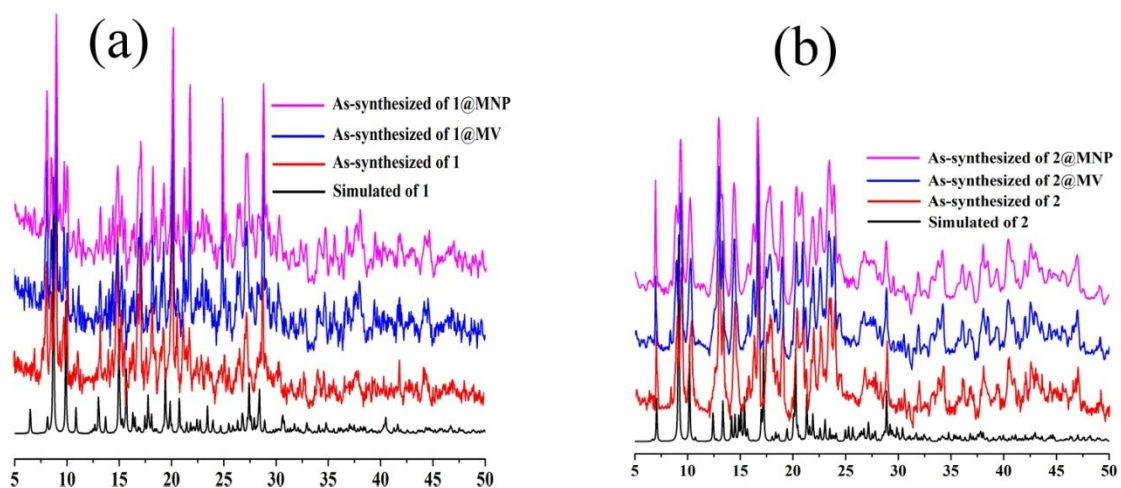

Fig. S4 Simulated PXRD patterns for **1** and **2** (black) obtained from single crystal data; PXRD patterns of as-synthesized compounds **1** and **2** (red); PXRD patterns of **1** and **2** isolated after photocatalysis of MV under UV light (blue) and PXRD patterns of **1** and **2** isolated after sensing of MNP (magenta).

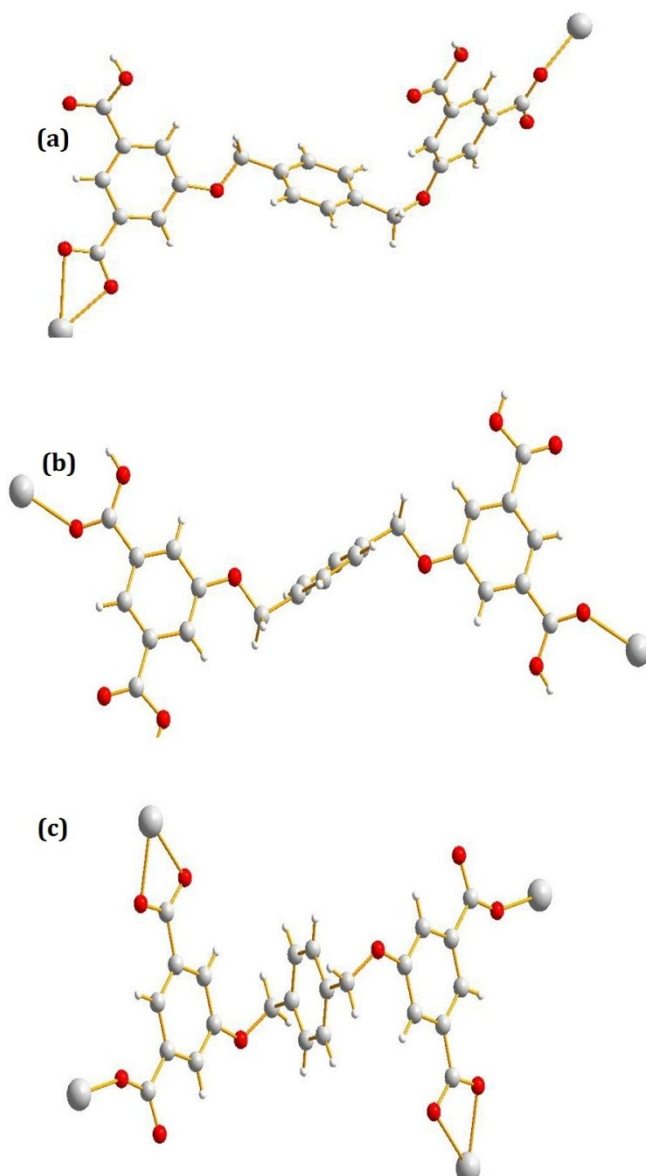

Scheme S1 view of the various coordination modes of  $H_4L$  in this work.

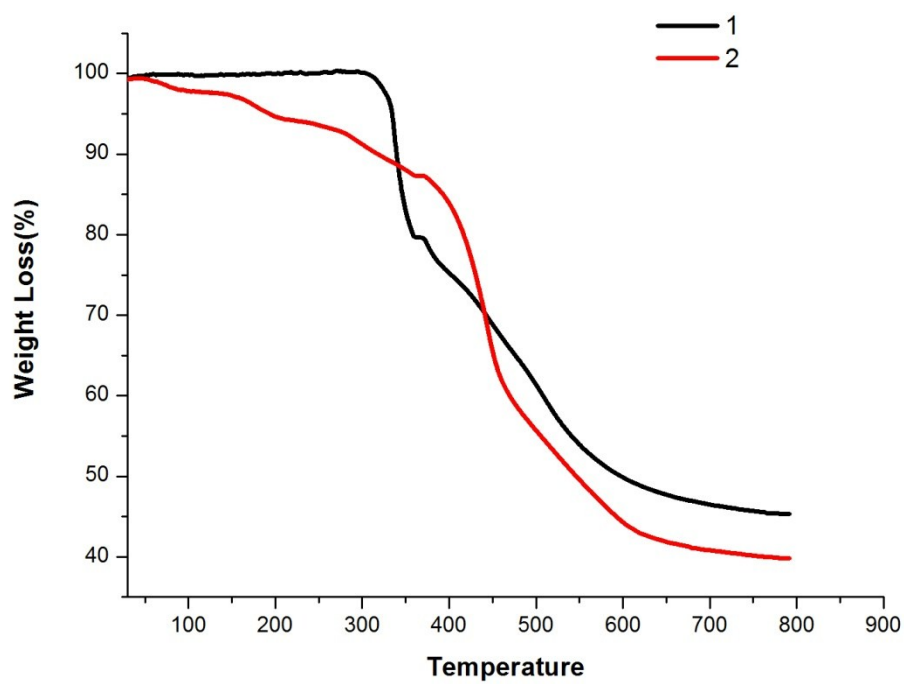

Fig. S5 TGA curves for MOFs 1 and 2.

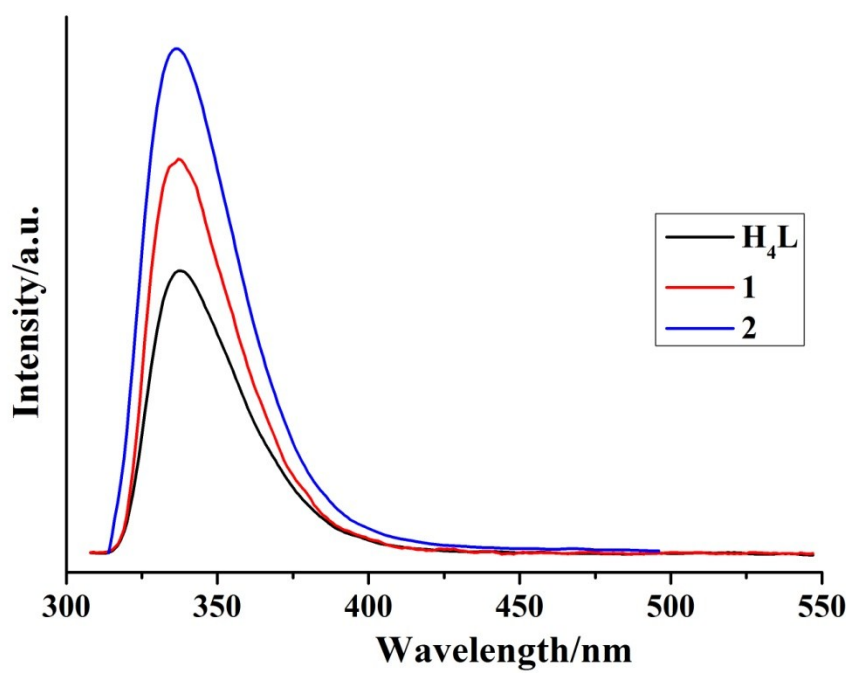

Fig. S6 PL intensities of H<sub>4</sub>L ligand and title MOFs.

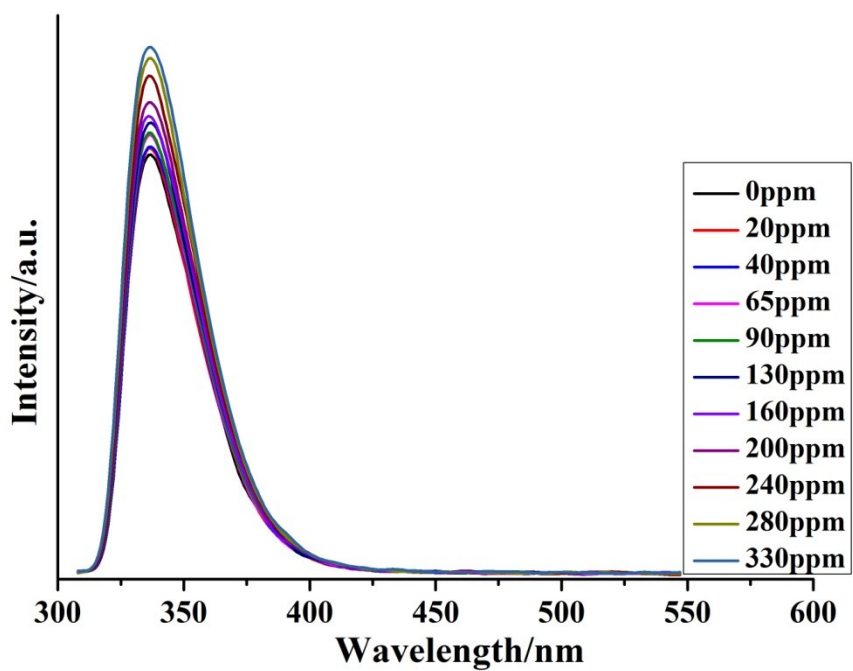

Fig. S7 Luminescent quenching of **1** dispersed in ethanol by the gradual addition of 1 mM solution of 1,2,4-TMB.

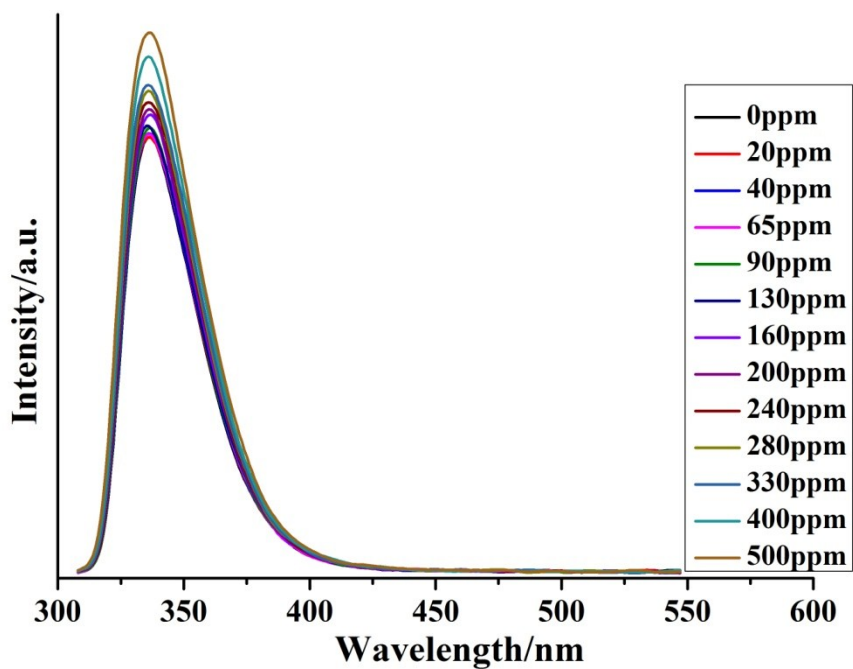

Fig. S8 Luminescent quenching of **1** dispersed in ethanol by the gradual addition of 1 mM solution of 1,3,5-TMB.

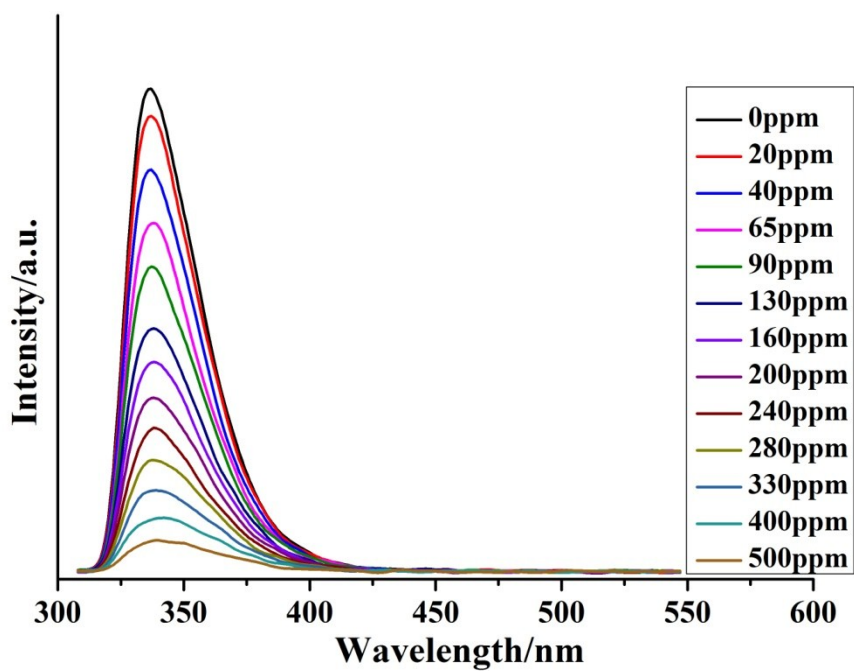

Fig. S9 Luminescent quenching of **1** dispersed in ethanol by the gradual addition of 1 mM solution of 1,3-DNB.

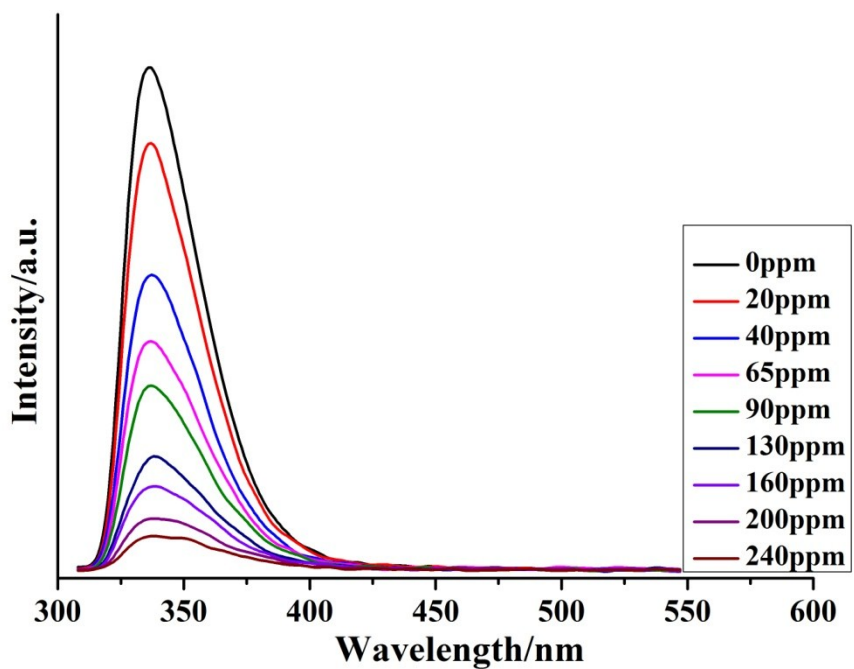

Fig. S10 Luminescent quenching of **1** dispersed in ethanol by the gradual addition of 1 mM solution of 2,4-DNT.

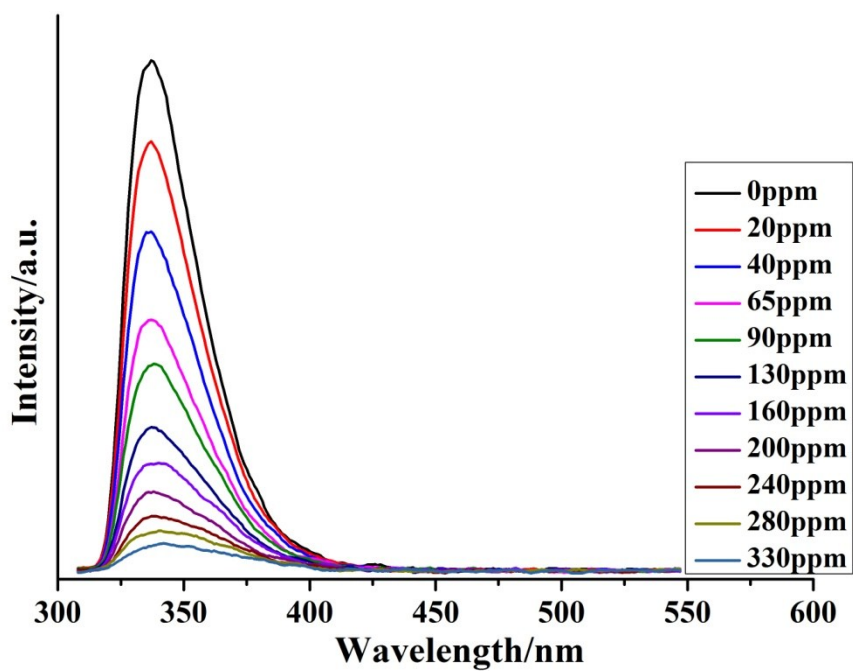

Fig. S11 Luminescent quenching of **1** dispersed in ethanol by the gradual addition of 1 mM solution of 2,6-DNT.

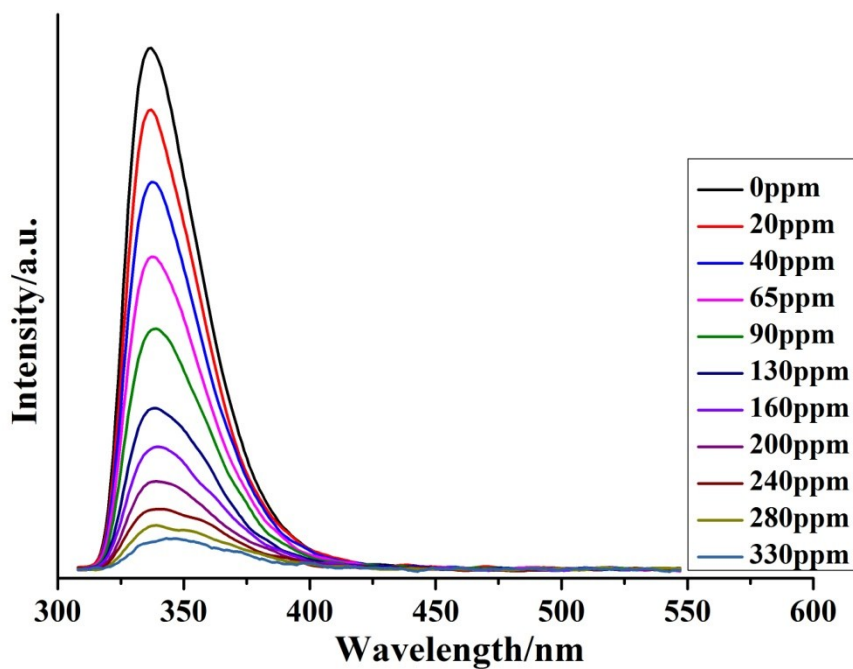

Fig. S12 Luminescent quenching of **1** dispersed in ethanol by the gradual addition of 1 mM solution of 2-NT.



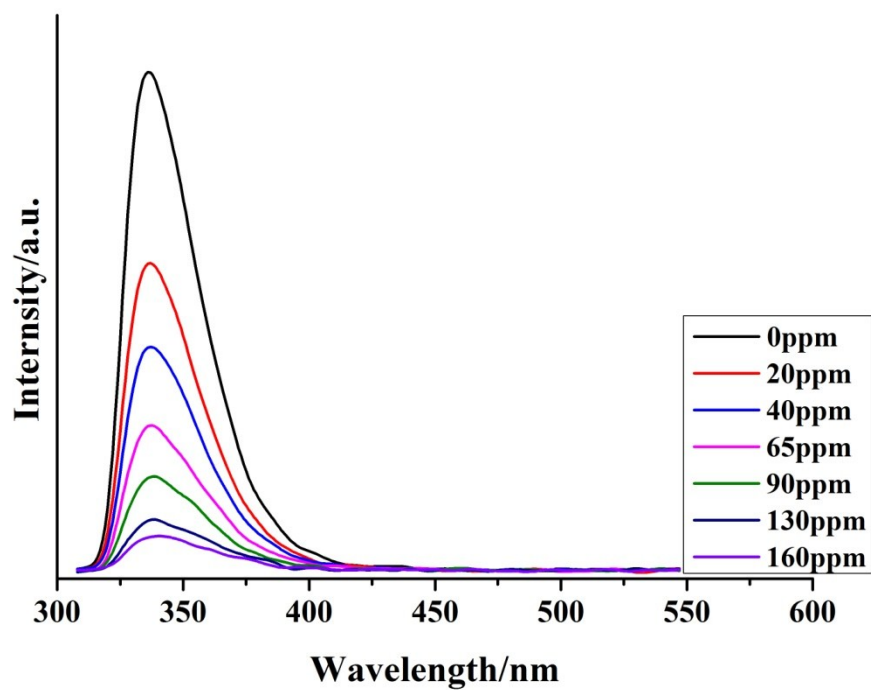

Fig. S13 Luminescent quenching of **1** dispersed in ethanol by the gradual addition of 1 mM solution of 4-NT.

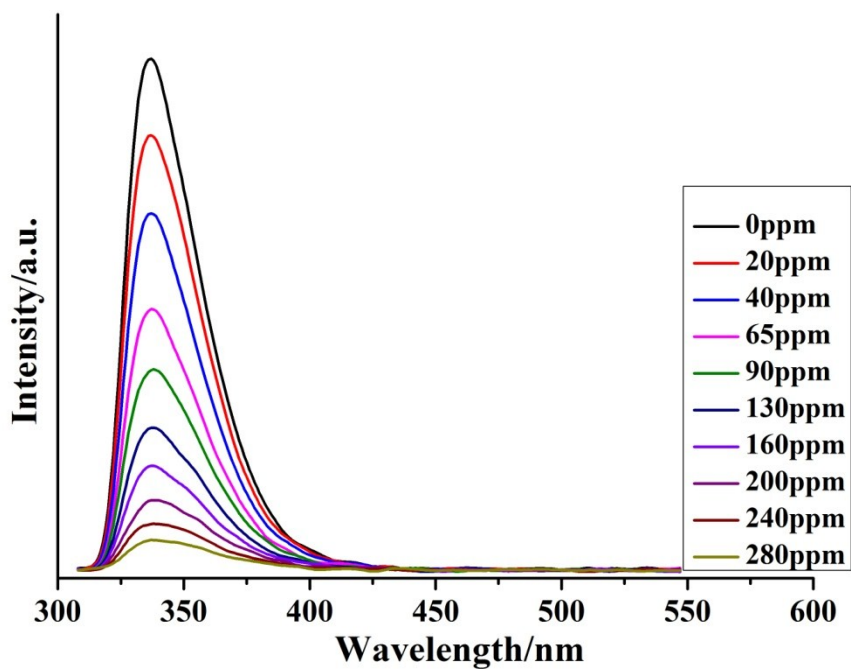

Fig. S14 Luminescent quenching of **1** dispersed in ethanol by the gradual addition of 1 mM solution of NB.

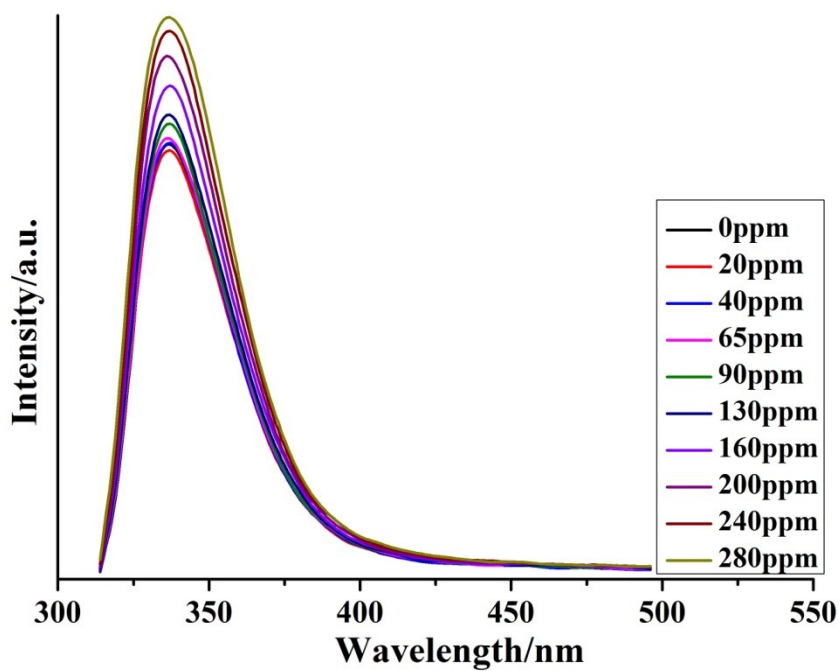

Fig. S15 Luminescent quenching of **2** dispersed in ethanol by the gradual addition of 1 mM solution of 1,2,4-TMB.

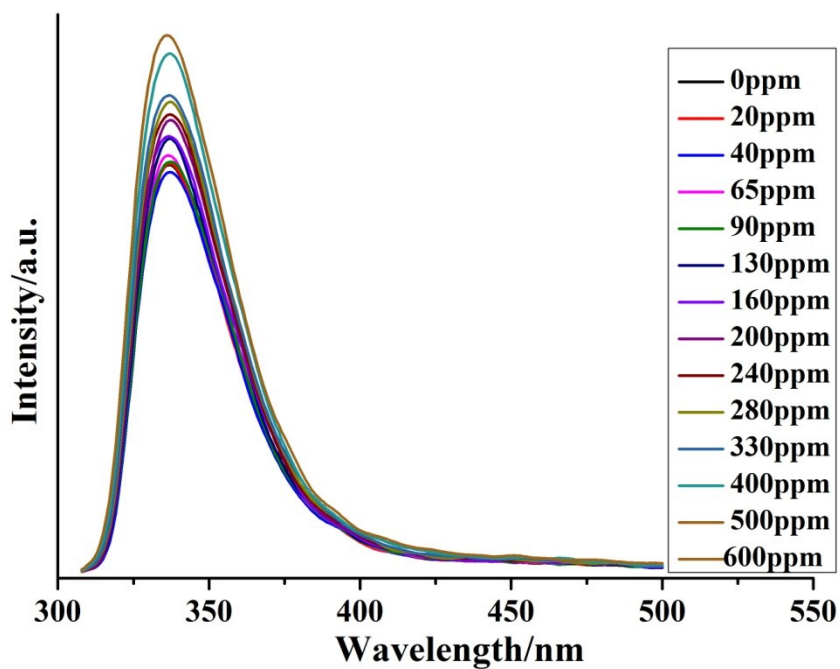

Fig. S16 Luminescent quenching of **2** dispersed in ethanol by the gradual addition of 1 mM solution of 1,3,5-TMB.

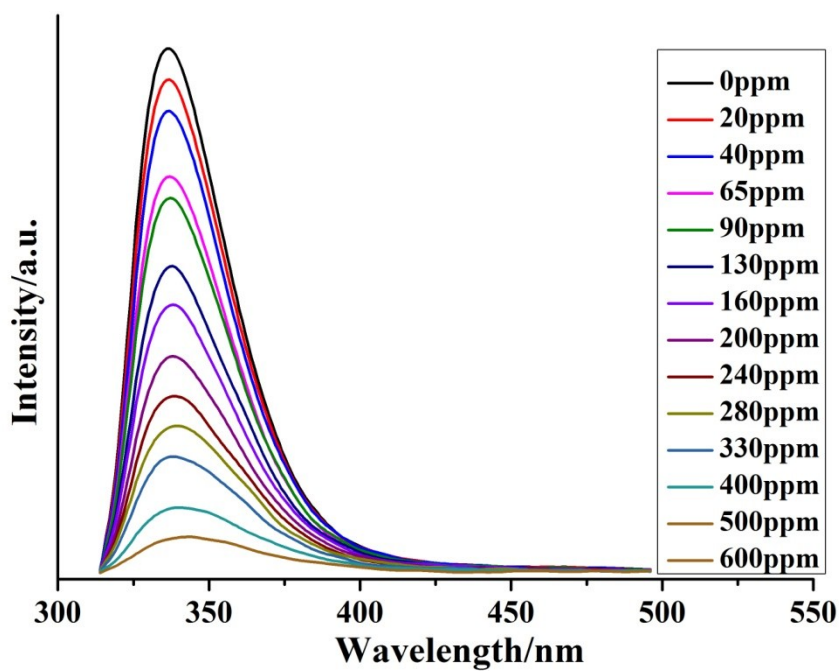

Fig. S17 Luminescent quenching of **2** dispersed in ethanol by the gradual addition of 1 mM solution of 1,3-DNB.

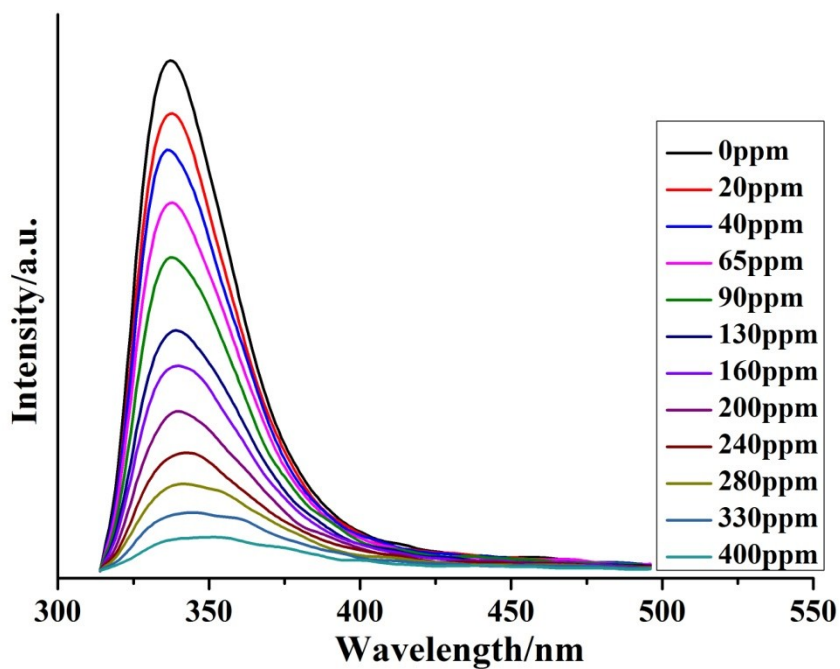

Fig. S18 Luminescent quenching of **2** dispersed in ethanol by the gradual addition of 1 mM solution of 2,4-DNT

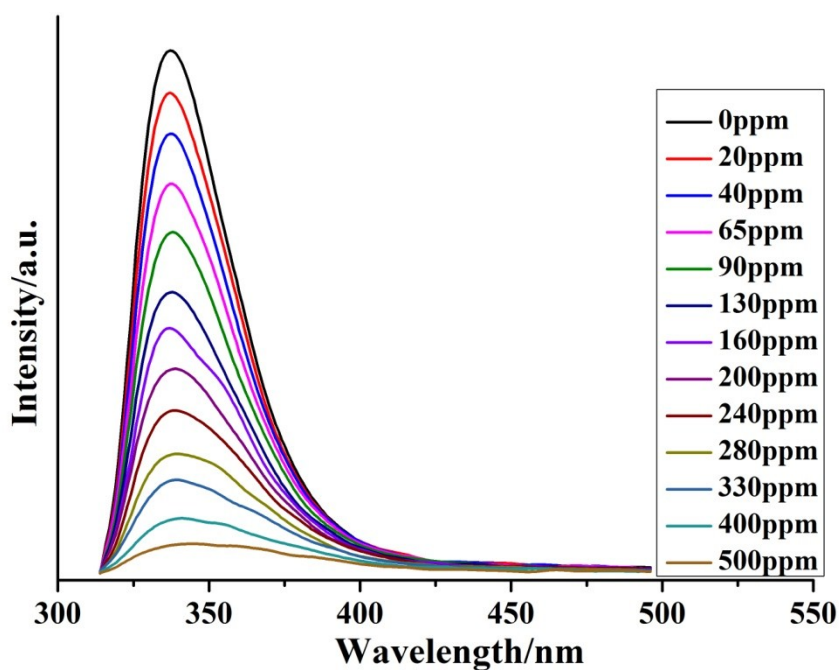

Fig. S19 Luminescent quenching of **2** dispersed in ethanol by the gradual addition of 1 mM solution of 2,6-DNT.

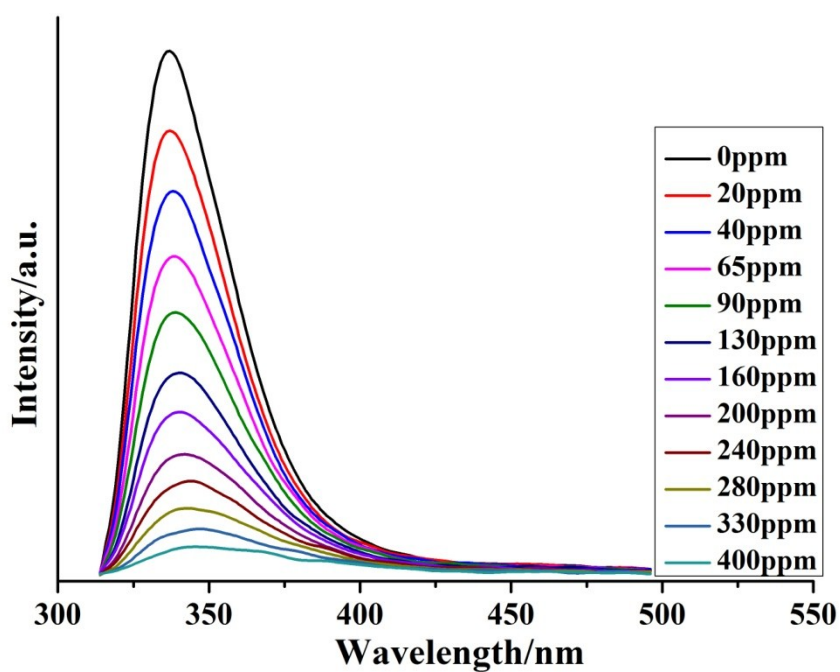

Fig. S20 Luminescent quenching of **2** dispersed in ethanol by the gradual addition of 1 mM solution of 2-NT.

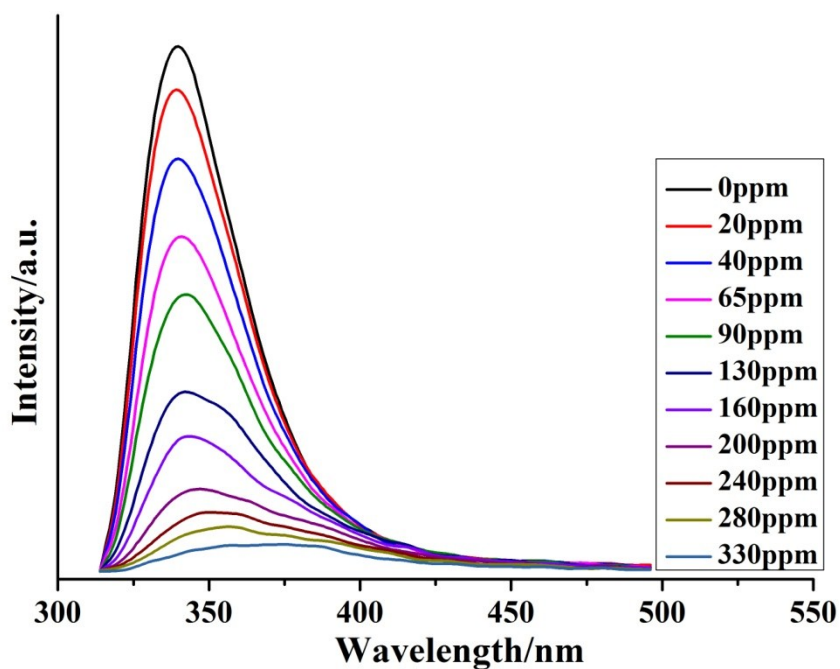

Fig. S21 Luminescent quenching of **2** dispersed in ethanol by the gradual addition of 1 mM solution of 4-NT.

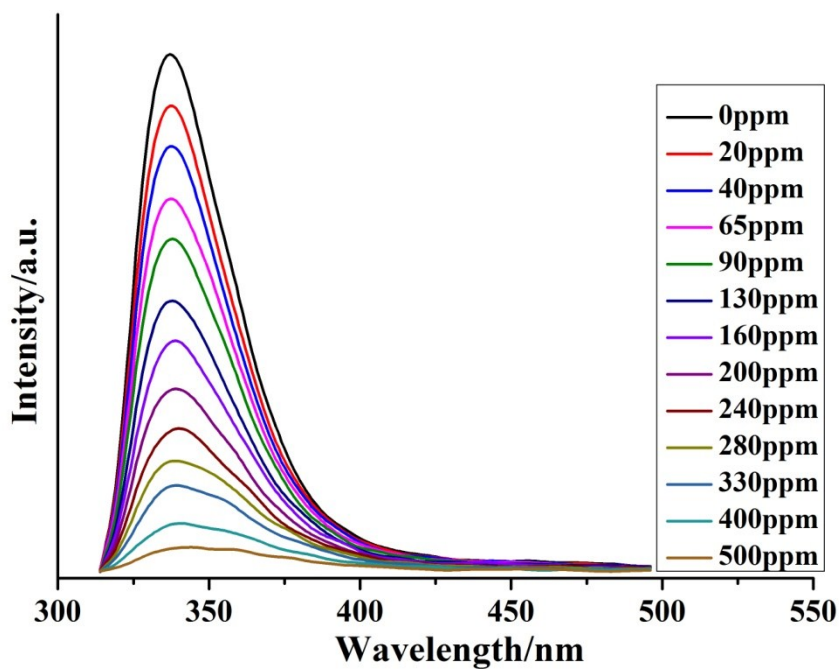

Fig. S22 Luminescent quenching of **2** dispersed in ethanol by the gradual addition of 1 mM solution of NB.

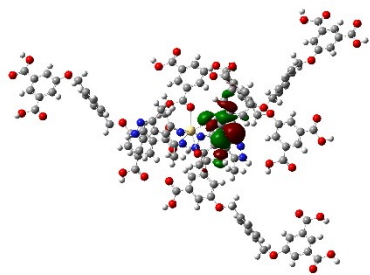

HOMO 1

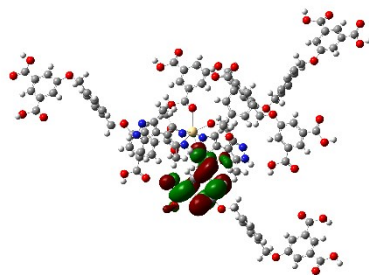

LUMO 1

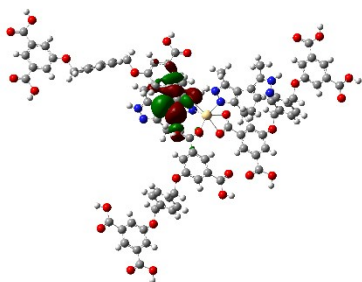

HOMO 2

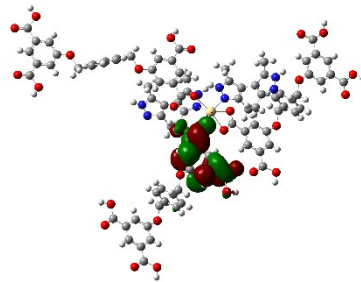

LUMO 2

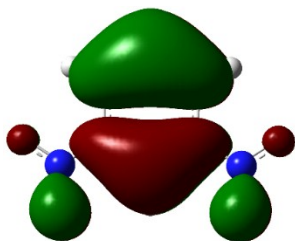

HOMO 1,3-DNB

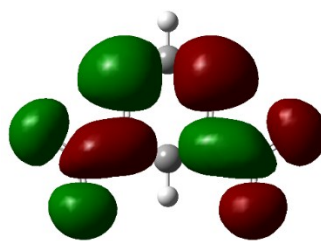

LUMO 1,3-DNB

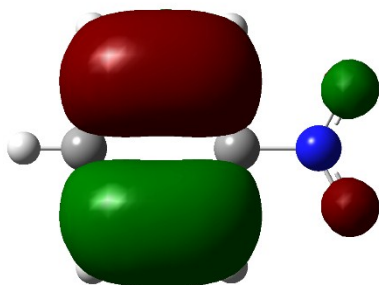

HOMO NB

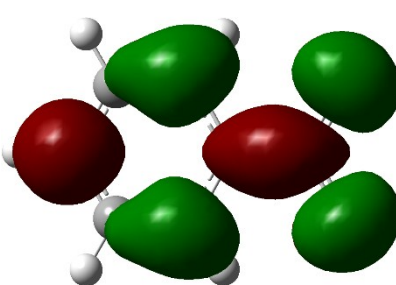

LUMO NB

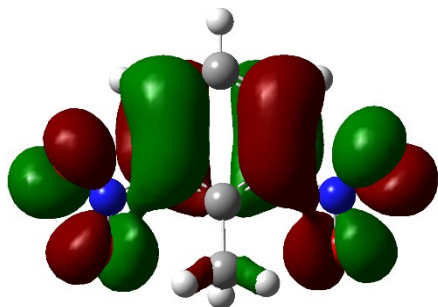

HOMO 2,6-DNT

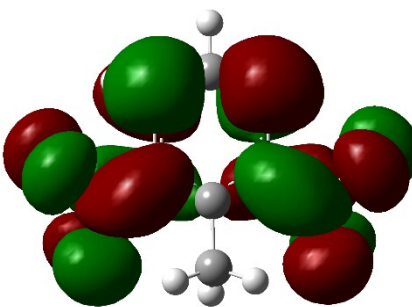

LUMO 2,6-DNT



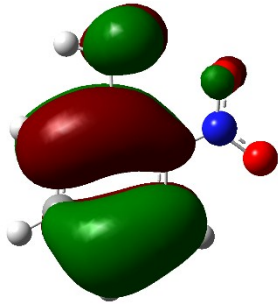

HOMO 2-NT

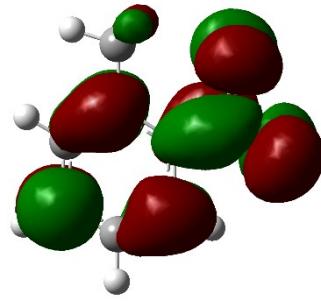

LUMO 2-NT

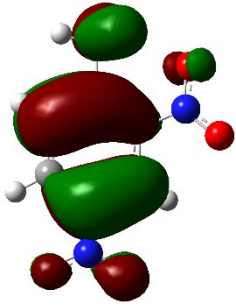

HOMO 2,4-DNT

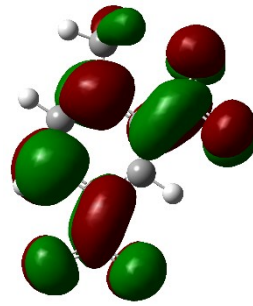

LUMO 2,4-DNT

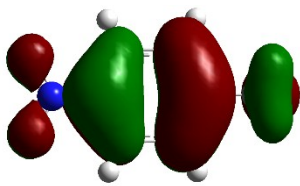

HOMO 4-NT

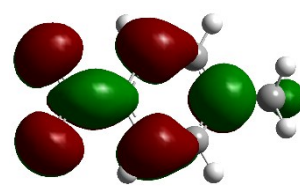

LUMO 4-NT

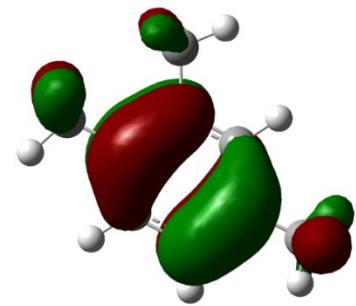

HOMO 1,2,4-TMB

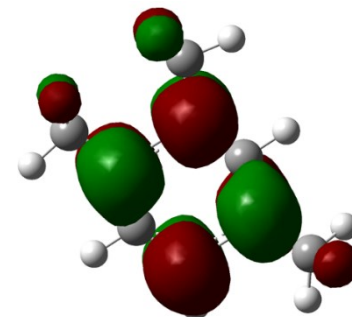

LUMO 1,2,4-TMB

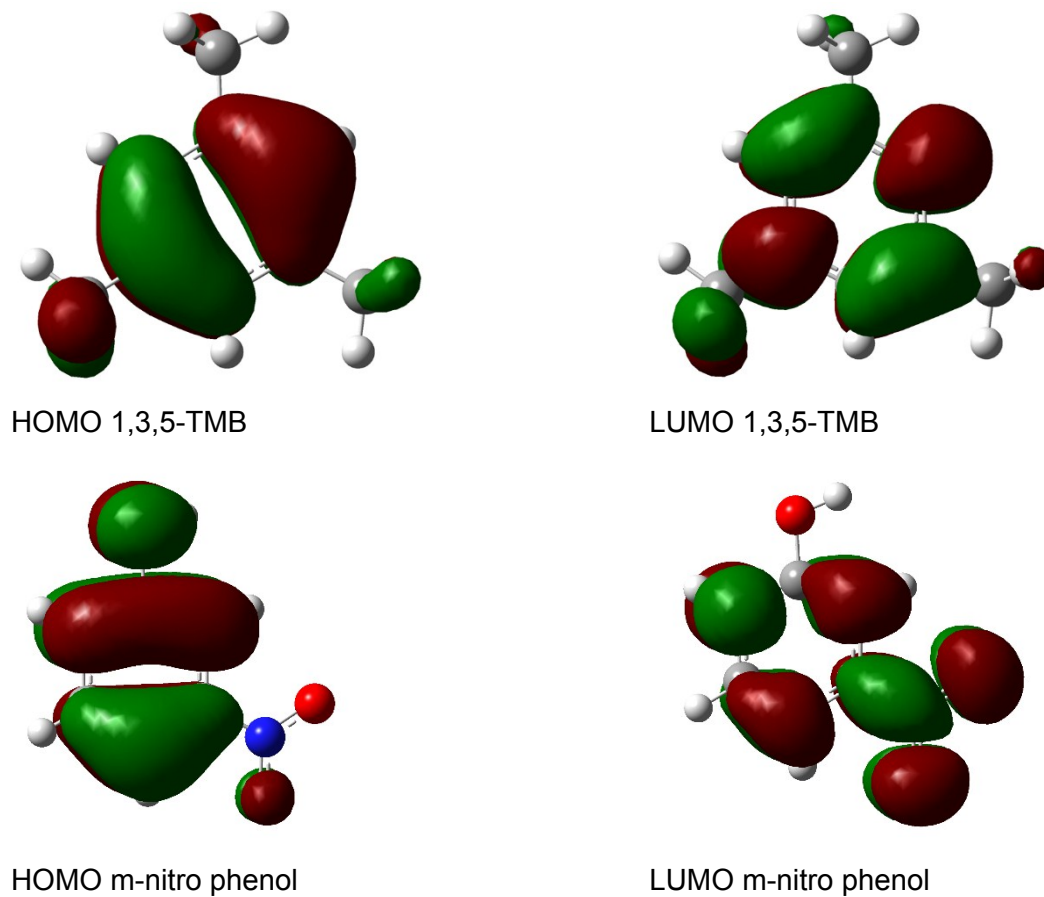

Fig. S23 HOMO-LUMO Plots for MOFs **1** and **2** as well as other analytes.

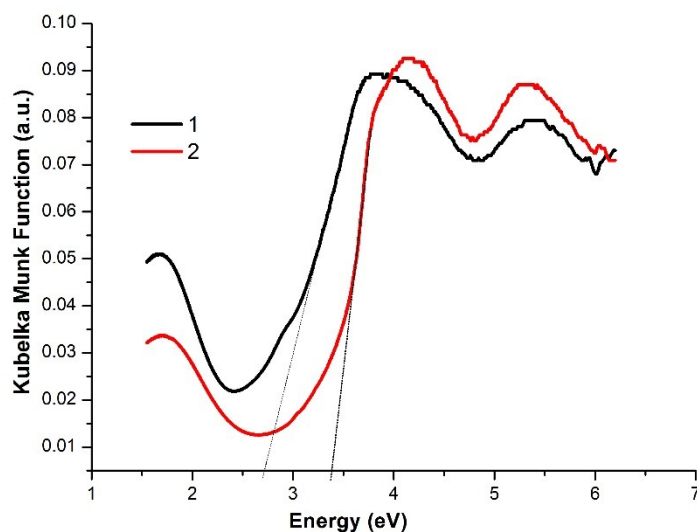

Fig. S24 The solid-state optical diffuse-reflection spectra for MOFs **1** and **2** derived from diffuse reflectance data at ambient temperature. The intercept of the extrapolated absorption edge on the energy scale (x axis) gives the band gap of the samples.



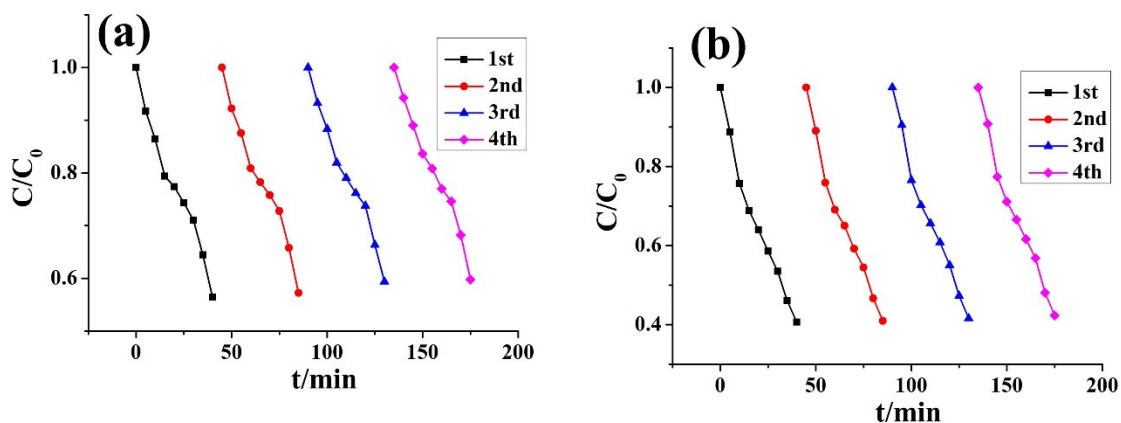

Fig. S25 Recycling tests of the photocatalytic degradation of MV by MOFs 1 (a) and 2 (b).

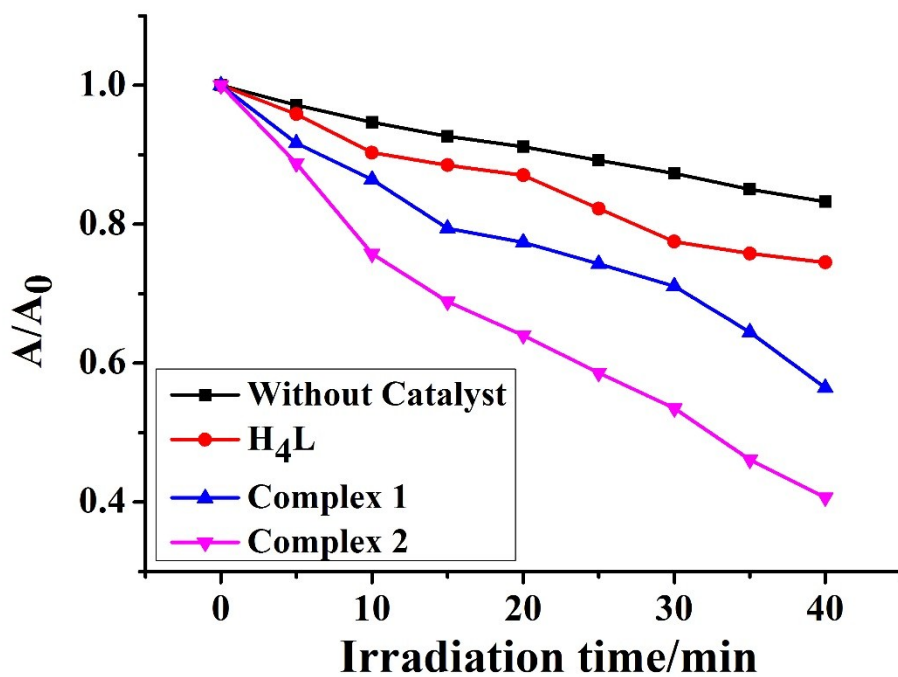

Fig. S26 Comparative photocatalytic efficiencies of MOFs, 1, 2,  $H_4L$  ligand for the photodegradation of MV under UV irradiation. Also, photodegradation of MV under control conditions without catalyst is presented.

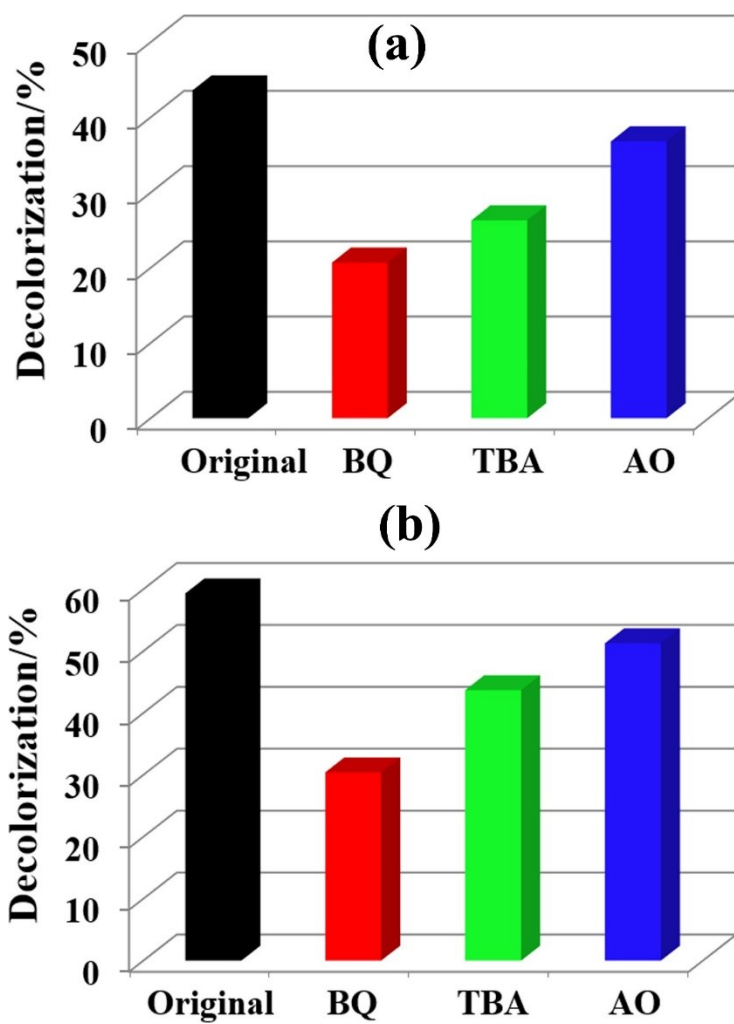

Fig. S27 The percentage degradation of MV under different conditions for 1 (a) and 2 (b).

**Table S1. Crystallographic data and structure refinement details for MOFs 1-2**

| Parameter                                                                             | 1                  | 2              |
|---------------------------------------------------------------------------------------|--------------------|----------------|
| Formula weight                                                                        | 767.02             | 767.02         |
| Crystal system                                                                        | Monoclinic         | Triclinic      |
| Space group                                                                           | P2 <sub>1</sub> /c | <i>P-1</i>     |
| Crystal Color                                                                         | Yellow             | Colorless      |
| <i>a</i> , Å                                                                          | 10.205(3)          | 9.8116(9)      |
| <i>b</i> , Å                                                                          | 27.207(7)          | 12.6840(12)    |
| <i>c</i> , Å                                                                          | 11.915(3)          | 13.3634(13)    |
| $\alpha$ , °                                                                          | 90                 | 94.724(3)      |
| $\beta$ , °                                                                           | 95.979(4)          | 95.303(3)      |
| $\gamma$ , °                                                                          | 90                 | 98.275(3)      |
| <i>V</i> , Å <sup>3</sup>                                                             | 3290.2(15)         | 1631.0(3)      |
| <i>Z</i>                                                                              | 4                  | 2              |
| $\rho_{\text{calcd}}$ , g/cm <sup>3</sup>                                             | 1.548              | 1.562          |
| $\mu$ , mm <sup>-1</sup>                                                              | 0.729              | 0.735          |
| <i>F</i> (000)                                                                        | 1560               | 780            |
| $\theta$ Range, deg                                                                   | 1.5-25.0           | 3.1-25.0       |
| Reflection Collected                                                                  | 16248              | 29745          |
| Independent reflections ( <i>R</i> <sub>int</sub> )                                   | 0.060              | 0.110          |
| Reflections with <i>I</i> > 2 $\sigma$ ( <i>I</i> )                                   | 5791               | 5731           |
| Number of parameters                                                                  | 446                | 450            |
| <i>R</i> <sub>1</sub> , <i>wR</i> <sub>2</sub> ( <i>I</i> > 2 $\sigma$ ( <i>I</i> ))* | 0.0492, 0.1262     | 0.0487, 0.0715 |
| <i>R</i> <sub>1</sub> , <i>wR</i> <sub>2</sub> (all data)**                           | 0.0718, 0.1507     | 0.0925, 0.0821 |

\*  $R = \sum(F_o - F_c) / \sum(F_o)$ , \*\*  $wR_2 = \{\sum[w(F_o^2 - F_c^2)^2] / \sum(F_o^2)^2\}^{1/2}$ .

**Table S2.** Selected bond distances (Å) and angles (deg) for **1** and **2**

| <b>1</b>                                      |            |                                               |            |
|-----------------------------------------------|------------|-----------------------------------------------|------------|
| Cd(1)-O(2)                                    | 2.374(4)   | Cd(1)-N(3)                                    | 2.280(4)   |
| Cd(1)-N(1) <sup>#1</sup>                      | 2.262(4)   | Cd(1)-O(7) <sup>#2</sup>                      | 2.475(4)   |
| Cd(1)-O(3) <sup>#3</sup>                      | 2.453(4)   | Cd(1)-O(10) <sup>#4</sup>                     | 2.249(4)   |
| <b>2</b>                                      |            |                                               |            |
| Cd(1)-O(1)                                    | 2.212(4)   | Cd(1)-O(6)                                    | 2.390(3)   |
| Cd(1)-N(4)                                    | 2.257(3)   | Cd(1)-N(1) <sup>#1</sup>                      | 2.268(3)   |
| Cd(1)-O(3) <sup>#2</sup>                      | 2.289(3)   | Cd(1)-O(4) <sup>#2</sup>                      | 2.552(3)   |
| <b>1</b>                                      |            |                                               |            |
| O(2)-Cd(1)-O(3)                               | 96.36(15)  | O(2)-Cd(1)-N(1) <sup>#1</sup>                 | 86.32(16)  |
| O(2)-Cd(1)-O(7) <sup>#2</sup>                 | 86.32(16)  | O(2)-Cd(1)-O(3) <sup>#3</sup>                 | 118.14(12) |
| O(2)-Cd(1)-O(10) <sup>#4</sup>                | 150.80(14) | N(1) <sup>#1</sup> -Cd(1)-N(3)                | 160.89(17) |
| O(7) <sup>#2</sup> -Cd(1)-N(3)                | 89.48(14)  | O(3) <sup>#3</sup> -Cd(1)-N(3)                | 80.70(13)  |
| O(10) <sup>#4</sup> -Cd(1)-N(3)               | 96.92(16)  | O(7) <sup>#2</sup> -Cd(1)-N(1) <sup>#1</sup>  | 109.48(16) |
| O(3) <sup>#3</sup> -Cd(1)-N(1) <sup>#1</sup>  | 81.37(15)  | O(10) <sup>#4</sup> -Cd(1)-N(1) <sup>#1</sup> | 89.51(16)  |
| O(3) <sup>#3</sup> -Cd(1)-O(7) <sup>#2</sup>  | 163.52(12) | O(7) <sup>#2</sup> -Cd(1)-O(10) <sup>#4</sup> | 78.35(13)  |
| O(3) <sup>#3</sup> -Cd(1)-N(10) <sup>#4</sup> | 89.66(13)  |                                               |            |
| <b>2</b>                                      |            |                                               |            |
| O(1)-Cd(1)-O(6)                               | 89.55(9)   | O(1)-Cd(1)-N(4)                               | 114.80(14) |
| O(1)-Cd(1)-N(1) <sup>#1</sup>                 | 105.59(14) | O(1)-Cd(1)-O(3) <sup>#2</sup>                 | 78.64(9)   |
| O(1)-Cd(1)-O(4) <sup>#2</sup>                 | 131.66(9)  | O(1)-Cd(1)-O(8) <sup>#2</sup>                 | 104.84(12) |
| O(6)-Cd(1)-N(4)                               | 78.42(10)  | O(2)-Cd(1)-N(1) <sup>#1</sup>                 | 78.31(12)  |
| O(3) <sup>#2</sup> -Cd(1)-O(6)                | 168.01(9)  | O(4) <sup>#2</sup> -Cd(1)-O(6)                | 138.75(9)  |
| O(6)-Cd(1)-C(8) <sup>#2</sup>                 | 165.51(12) | N(1) <sup>#1</sup> -Cd(1)-N(4)                | 132.70(13) |
| O(3) <sup>#2</sup> -Cd(1)-N(4)                | 104.54(10) | O(4) <sup>#2</sup> -Cd(1)-N(4)                | 83.96(11)  |
| N(4)-Cd(1)-C(8) <sup>#2</sup>                 | 96.61(12)  | O(3) <sup>#2</sup> -Cd(1)-N(1) <sup>#1</sup>  | 106.67(12) |
| O(4) <sup>#2</sup> -Cd(1)-N(1) <sup>#1</sup>  | 87.23(12)) | O(3) <sup>#2</sup> -Cd(1)-O(4) <sup>#2</sup>  | 53.15(9)   |

Symmetry Codes: **For 1:** #1= -1+x, y, z; #2= 1+x, y, 1+z; #3= -1-x, -y, -z; #4= 1+x, 1/2-y, 3/2+z; **For 2:** #1 = 1+x, y, z; #2 = 2-x, 1-y, -z.

**Table S3 LOD values for previously reported materials and MOFs 1 and 2 against MPN**

| Material                                | LOD      | Ref       |
|-----------------------------------------|----------|-----------|
| UiO-66-NH <sub>2</sub>                  | 0.77     | 1         |
| graphite                                | 1049.643 | 2         |
| montmorillonite                         | 0.756    | 3         |
| C/N-Au                                  | 0.74     | 4         |
| calix[4]arene-bonded silica gels        | 2.8      | 5         |
| NH <sub>2</sub> -MCM-48                 | 102.04   | 6         |
| flay ash                                | 8.06     | 7         |
| organically modified diatomaceous earth | 8.139    | 8         |
| clinoptilolite                          | 60       | 9         |
| <b>1</b>                                | 1.09     | This work |
| <b>2</b>                                | 0.81     | This work |

**References:**

- 1 Y. Dou, L. Guo, G. L. Li, X. X. Lv, L. Xia and J. You, *Microchem. J.* 2019, 146, 366–373
- 2 L. Y. Yu, X. W. Wu, Q. Liu, L. L. Liu, X. Y. Jiang, J. G. Yu, Chen, Feng, M. Zhong, *J. Nanosci. Nanotech.*, 2016, 16, 12426-12432.
3. R. S. Juang, S. H. Lin and K. H. Tsao, *J. Coll. Inter. Sci.*, 2004, 269, 46-52.
4. H. F. Zhou, S. X. Li, Y. J. Wu, D. J. Chen, Y. H. Li, F Y. Zheng and H. W. Yu, *Sensors Actuators B*, 2016, 237, 487–494
- 5 Y. E. Dolaksiz, F. Temel and M. Tabakci, *React. Funct. Polymer*, 2018, 126, 27–35
- 6 X.X. Gu, H. Kang, H. Li, X. C. Liu, F. Dong, M. Fu and J. R. Chen, *J. Chem. Eng. Data* 2018 63 93606-3614.
- 7 Singh, B. K.; Nayak, P. S. S, *Sci. Technol.* 2004, 22, 295–309.
- 8 Al Bakain, R. Z.; Abu-Zurayk, R. A.; Hamadneh, I.; Khalili, F. I.; Al-Dujaili, A. H. *Water Treat.* 2015, 56, 826–838.
- 9 Sismanoglu, T.; Pura, S. *Colloids Surf. A* 2001, 180,1–6.

**Table S4 Performances of some MOFs used as photocatalysts for the degradation of MV under UV irradiation.**

| MOF                                                                                          | Irradiation | Degradation Efficiency (%) | ref       |
|----------------------------------------------------------------------------------------------|-------------|----------------------------|-----------|
| [Cd(4,4'-bpy)(H <sub>2</sub> O) <sub>2</sub> (S <sub>2</sub> O <sub>3</sub> ) <sub>2</sub> ] | UV          | 99                         | 1         |
| [Cd <sub>2</sub> (4,4'-bpy) <sub>2.5</sub> (S <sub>2</sub> O <sub>3</sub> ) <sub>2</sub> ]   | UV          | 95                         | 1         |
| [Co <sub>2</sub> (1,4-bdc)(nncp) <sub>2</sub> ]                                              | Vis         | 33                         | 2         |
| [Cd(bidpe)(hmpa)]                                                                            | UV          | 93                         | 3         |
| [Zn <sub>2</sub> (L)(DMF) <sub>3</sub> ]                                                     | UV          | 72                         | 4         |
| <b>1</b>                                                                                     | UV          | 82                         | This work |
| <b>2</b>                                                                                     | UV          | 46                         | This work |

References:

- 1 A. K. Paul, G. Madras and S. Natarajan, *Phys. Chem. Chem. Phys.*, 2009, **11**, 11285–11296.
- 2 H.-Y. Sun, C.-B. Liu, Y. Cong, M.-H. Yu, H.-Y. Bai and G.-B. Che, *Inorg. Chem. Commun.*, 2013, **35**, 130–134.
- 3 Z. A. Zong, C. B. Fan, C. F. Bi, X. Zhang, R. Luo, X. M. Meng, F. Jin and Y. H. Fan, *J. Solid, State. Chem.*, 2019, **270**, 651-665.
4. J. C. Jin, J. Wu, Y. X. He, B. H. Li, J. Q. Liu, R. Prasad, A. Kumar and S. R. Battem, *CyrstEngComm.*, 2017,**19**, 6464-6472
